# Supplementary material for: Intensive Blood Glucose Control and Vascular Outcomes in Patients with Type 2 Diabetes
Source: Atypon-hosted journal article supplement (doi:10.1056/nejmoa0802987), 2008-06-06
Supplement: nejm_advance_2560sa1.pdf [file nejm_advance_2560sa1.pdf]

## Supplementary Appendix

This appendix has been provided by the authors to give readers additional information about their work.

Supplement to: The ADVANCE Collaborative Group. Intensive blood glucose control and vascular outcomes in patients with type 2 diabetes. *N Engl J Med* 2008;358:2560-72. DOI: [10.1056/NEJMoa0802987](https://doi.org/10.1056/NEJMoa0802987).

# Supplementary Appendix

## 1. List of full collaborative group (centers and names)

**Writing Committee:** A Patel, S MacMahon, J Chalmers, B Neal, L Billot, M Woodward, M Marre, M Cooper, P Glasziou, DE Grobbee, P Hamet, S Harrap, S Heller, LS Liu, G Mancina, CE Mogensen, CY Pan, N Poulter, A Rodgers, B Williams, S Bompont, B de Galan, R Joshi, F Travert.

**Management Committee:** J Chalmers, S MacMahon (*co-principal investigators*), A Patel (*study director*), M Cooper, E Ferrannini, P Glasziou, D Grobbee, P Hamet, S Harrap, S Heller, LS Liu, G Mancina, M Marre, CE Mogensen, B Neal, CY Pan, N Poulter, A Rodgers, B Williams, M Woodward.

**Data Safety and Monitoring Committee:** R Collins (*chair*), R Holman, P Sandercock, P Sleight.

**End Point Adjudication Committee:** G Fulcher (*chair*), M Adams, M Branley, B Jenkins, D Louis, H Lowe, W Luo, A McCormack, P Mitchell, S Ong, C Pollock, J Watson, T Wong.

**Statistical Analysis:** L Billot, S Bompont, S Colman, L Francis, S Heritier, Q Li, T Ninomiya, A Pillai, M Woodward.

**Glucose Control Consultants:** F Travert (*co-ordinator*), A Baksi, YQ Bao, R Cutfield, B de Galan, R Dumas, J Fovenyi, HJ Fu, G Fulcher, H Huang, PH Jia, A Khir, B Krahulec, CL Li, J Li, A Litonjua, R MacIsaac, E Placzkiewicz-Jankowska, S Quirk, S Southern, C Tack, N Tandon, ZR Xu, JC Zhang, Z Zhang, XM Zou.

**Glucose Control Advisory Group:-** S Heller (*chair*), S Del Prato, G Fulcher, P Hamet, CY Pan.

**International Co-ordinating Centers:** *Sydney, Australia* – S Flynn (*senior project manager*), H Monaghan (*senior project manager*), S Allen, YF Bi, A Carreras, A Cass, T Chen, R Currie, P Davies, B de Galan, X Du, J Fathers, S Gibb, S Girgis, A Graziano, S Heritier, J Hibbard, S Hough, A Huynh, S Jan, M Jardine, K Jayne, R Joshi, AP Kengne, N Li, X Liu, A Malloys, A Morrison, B Mullane, R Ng, E Orpilla, S Pandey, M Parkinson, N Perkins, V Perkovic, J Regaglia, C Rodeghiero, S Ryan, M Schmidt, J Singleton, G Starzec, F Travert, F Turnbull, B Vijayan, P Yabsley. *Auckland, New Zealand* – A Bormans, J Faatui, B Gray, T Holloway, C Mills, A Milne, C Ng, M Ng, S Pink, J Van Rooyen, S Waghulde. *Beijing, China* - D Han, B Liu, XP Wang.

**Regional Co-ordinating Centers:** *Australia, New Zealand, South & East Asia* – S Harrap (*regional principal investigator*), J Reid, R Subramaniam, F Williams (*regional co-ordinators*), B Chan, S Chan, V Chaturvedi, S Flett, D Hynd, P Jeemon, A Leahy, E McGrath, S Noske, D Prabhakaran, KS Reddy, S Shah, N Tandon. *Canada* – P Hamet

(*regional principal investigator*), D De Guise, M-R Guertin (*regional co-ordinators*), P Chretien, C Daneau, D Martineau, M St-Onge. *China* – LS Liu (*regional principal investigator*) LY Ma, W Wang (*regional co-ordinators*), JL Chen, JW Chen, Q Deng, Y Ge, H Sui, RK Tang, XJ Yu, XM Zhao, XM Zou. *Europe-Continental* – DE Grobbee (*regional principal investigator*), A Bak, W Bobbink, M Gilsing, K Williamson (*regional co-ordinators*), A Blizanowska, C Derne, G Descusse, M Fafejtova, G Haars, M Hafkamp, G Jongebreur, M Kladvivova, S Leveque, M Noury, D Paddenburg, E Peterfai, M Powidel, V Puzej, Raczova, V Ruda, S Soedamah-Muthu, R Stolk, A Suiker, K P van Bemmelen, C van Everdingen, C Weber, H Wisse. *Europe-Northern* – N Poulter (*regional principal investigator*), A Adderkin (*regional co-ordinator*), L Cheeseman, T Cullen, E Currie, M Ekeroth, J Field, N Glaser, S Heffernan, E Massie, I Michitiuc, S Mirza, Y Ngai, A Owers, E Petchey, A Rask, T Sasikaran, L Small, E Spanidis, A Wilson.

***Sub-study Committees:*** *ADVANCE Echocardiography Sub-study* - R Doughty (*chair*), J Baker, G Gamble, G Jerums, H Walsh, G Whalley. *AdRem (ADVANCE REtinopathy Measurements) Sub-study* - DE Grobbee (*chair*), R Stolk and K Cruickshank (*Co-Principal Investigators*), S Aldington, J Beulens, A Hughes, J Lu, T Meijers, K Nijssen, A Stanton, N Tandon, S Thom, M van Schooneveld, J Vingerling, H Wisse. *ADVANCE Cost Effectiveness and Quality Of Life Substudy* - P Glasziou (*chair*), J Alexander, E Beller, P Clarke. *Prognomix (ADVANCE Genetics Substudy)* - P Hamet (*chair*), J Chalmers, S Harrap, S MacMahon, J Tremblay, M Woodward.

***Local Clinical Centers:***

*Australia (22 centers, 983 participants)* – P Nugent, D Topliss, J Warner (Alfred Hospital, Melbourne), C Jacklin, G Jerums, K McNeil (Austin and Repatriation Medical Center, Melbourne), M Correcha, M Hines, F Margrie, C Nolan, N Petrovsky, D Silva, L Socha, J Sunderland, A Todor (Canberra Hospital), D Darnell, M Fernandez, P Forbes, A Harvey, S Littlefield (Gosford Hospital), B McGrath, C Meyer, R Singh, H Teede, J Wong, A Yeap, S Zoungas (Dandenong Hospital), S Bohra, V Clowes, D Simmons (Dept.of Rural Health, Shepparton), T Davis, M England, M Gillett, D Jackson, N Kamber, V Panicker, V Rakic, K-E Schimke, H van Nguyen (Fremantle Hospital), J Beggs, P Davoren, M Kamp, F Turner (Gold Coast Hospital), D Cooke, R Fassett, J Shepherd, S Smith (Launceston General Hospital), J Chow, M Curtale, B Malkus, G Rayment, T Spicer, M Suranyi, M Wong (Liverpool Hospital, Sydney), C Anderson, J Bradshaw, A Hoh, W Jeffries, J Turner (Lyell McEwin Health Service, Adelaide), A Gledhill, T Hannay, K Haworth, E Hendrich, H McIntyre, M McIntyre, A Morton, J Pennisi (Mater Hospital, Brisbane), R Borger, Y Chan, K Chan, S Colagiuri, J Hoang, V Naidu, S Perampalam, E Por, T Sourjina, N Tejani (Prince Of Wales Hospital, Sydney), C Bendall, J Budgeon, D Carey, F De Looze, F Lepre, J Stephensen (Princess Alexandra Hospital, Brisbane), P Carroll, M Duroux, C Larter, M Ratcliffe (Redcliffe Hospital), C Miller, PA Phillips, S Stranks, P Taylor (Repatriation General Hospital Adelaide), A Bune, G Fulcher, A Fuller, C Pollock, P Stack (Royal North Shore Hospital, Sydney), M Kean, J Wong, D Yue (Royal Prince Alfred Hospital, Sydney), S Baker, L Bittinger, R Cotton, D Eccleston, P Harvey, B Jackson, V Lawlor, S-T Liaw, C Neil, M Park, E Premaratne, F Pyrlis, G Rudge (The Northern Hospital, Melbourne), D Beattie, Y Tan (Townsville Mater Hospital), G Brozowska, D Das, M Gan, B Goss, K Park, S Perampalam, D Shirkhedkar, C Sullivan, A Ting (Wentworth Diabetes Cente, Sydney), G

Calvert, E Lucas, R Moses, N Natrass, R Slobodniuk, A Webb (Clinical Trials Research Unit, Wollongong Hospital).

*Canada (14 centers, 436 participants)* – B Binder, S Jetha, S Ross, L Visvanatha (Calgary Metabolic Education and Research Centre), A Bélanger, R Dumas, S Gauthier, M Labbé, J Raymond (Centre de recherche clinique de Laval), C Godin, C Lachance, B St-Pierre (Centre de recherche d'endocrinologie, Sherbrooke), M-F Langlois, P Maheux, F Poulin, C-L Thibodeau (Centre Hospitalier de L'université de Sherbrooke), J-L Chiasson, N Ciuria, F Gossard, P Hamet, L Julien, S Potvin, P Van Nguyen, I Vigneault (Centre hospitalier de l'Université de Montréal), J Blais, G Gosselin, N Harvey, C Masson, Y Robitaille, C Savard (Centre Hospitalier Le Gardeur, Repentigny), C Durand, C Fleury, S Kouz, M Proulx, M Roy (Centre Hospitalier Régional de Lanaudière, Joliette), J Bradley, M Marcoux, M Parmar, T Séguin (Neureka Research, Timmins), M Blanchet, F Dubé, D Garceau, C Garceau, L Kelly, I Kirouac, L Mercier, M Pleau, E Plourde, K Raby, D Trudel (Centre hospitalier universitaire de Laval), B Al-Beirut, C Ingraham, A McGibbon, A Patterson, S Reidy, J Tuttle, E Ur (Queen Elizabeth II Health Science Centre, Halifax), L Cauchi, N Furtado, R McManus, N Rodger (St. Joseph's Health Centre, London), M Ali, C Dion, L Forestell, K Godden, S McJannet, S Nawaz, R Poirier (Sudbury Cardiac Research), K Dawson, J Lewis, D Thompson (University of British Columbia, Vancouver), D Bédard, R Josse, L Leiter (University of Toronto).

*China (49 centers, 3293 participants)* – CX Chen, ZX Wang, KG Wu, F Yang (1st Affiliated Hospital of Fu Jian Medical University), YM Shi, XF Yan (1st Affiliated Hospital of Henan Medical University), YC Ding, G Sun, F Wang (2nd Aff. Hospital of Baotou Medical College), FY Liu, HS Yang, KS Zhu (305 Hospital of Chinese P.L.A, Beijing), CM Liu, JM Yin (3rd Hospital of Tianjin City), MY Li, LF Liu, B Liu, JS Shi (5th Internal Medicine of Chinese Air Force General Hospital), JY Liu, HB Liu, YS Wu (Aff. 1st Hospital of Jiang Xi Medical College), YH Liu, PQ Zhang, LM Zhang (Aff. 2nd Hospital of Dalian Medical University), WS Liu, RY Wang, SY Zhang (Aff. 2nd Hospital of Hebei Medical University), L Hu, FF Jiang, Y Wu (Aff. 3rd Hospital of Jiang Xi Medical University), MW Chen, Y He, TR Pan, MG Yang, Q Zhang (Aff. Hospital Of Anhui Medical University), MX Gong, LX Shi, DR Wu, HJ Zhuang (Aff. Hospital of Guiyang Medical College), YF Bi, YH Chen, LQ Gu, G Ning, LZ Zhang (Aff. Ruijin Hospital of Shanghai 2nd Med. Univ), HJ Fu, HB Li, SY Yuan (Beijing Tongren Hospital), FY Jia, FY Shi, GS Tian (Baotou Iron and Steel Corporation's Hospital), SQ Liu, J Zhang (Beijing Anzhen Hospital of Capital Medical University), JL Tang, SY Wang, YX Wang, JX Zhu (Beijing Hypertension League Institute), JY Cui, J Geng, RB Jia, L Qin, HY Wang (Bin Zhou City People's Hospital), JG Jin, XM Li, XP Lu, WB Wang (Capital Steel Hospital, Beijing), LY Zhang (Cardio-Cerebrovascular Disease Preventing and Treatment Study Centre Of Ningbo City), MY Bai, BL Hu, RC Shen (Cardiovascular Institute & Fu Wai Hospital), XM Wu, LQ Zhang (Cardiovascular Institute of Shanxi Province), CZ Wang, ZR Zheng (Center Hospital of Aviation of China, Beijing 361 Hospital), CL Li, H Tian, ST Yan (Center of Endocrinology, Chinese PLA General Hospital, Beijing 301 Hospital), YY Lin, ZM Liu, YQ Shi, W Tang (Chang Zheng Hospital of Shanghai), ST Zhang, SJ Zhu (Clinical Trial Center, Shandong Academy Med. Sciences), H Ge (Dept. of Cardiology , Beijing 306 Hospital), BX Guo, SG Qie (Dept. of Cardiology, Red Cross Hospital, Shenyang City), CH

Ni, AH Wang, ZR Xu, DM Zhao (Dept. of Endocrinology, Beijing 306 Hospital), Y Gao, XH Guo, PH Jia (First Hospital of Peking University), XJ Li, YH Wu, HL Yu (First Hospital of Huaxi Medical University), HX Zhang, YH Zhou (Hebei Academy of Medical Sciences), AQ Li, LP Shi (Hospital of Kailuan Tangshan), FH Lu, Qi Tian, YX Zhao (Institute of Cardiovascular Disease, Shandong Academy of Medical Sciences), T Chen, D Shu (Institute of Gerontology of Benxi City), RW Bian, L Chen, J Li (Jiangsu Institute of Geriatrics, Nanjing), H Lu, SH Zhang (Jiuxianqiao Hospital, Beijing), J Li, DM Yu, Zhe Zhang, QM Zhang (Metabolic Disease Hospital of Tianjin Medical University), LL Shen, WG Wang (No.1 Hospital of Lian Yungang City), TJ Zhang, S Zhu (No.1 Municipal Hospital Chengdu), YQ Bao, WP Jia, H Zhang (No.6 Renmin Hospital of Shanghai City), YL Jing, J Yang (Peking Union Medical College Hospital), YJ Li, F Zhang (Qingdao Municipal Hospital), SL Chu, XY Wang (Shanghai Hypertension Institute), FR Gao, XW Gao, JC Zhou (The Institute of the Aged Gerontology of Inner Mongolia Autonomous Region Hospital), Q Li, SW Wang, Y Xiang, JC Zhang (The Second Affiliated Hospital of Harbin Medical University), WP Li, M Sun, HY Zhou (Xiang-ya Hospital, Hunan Medical University), LJ Ren (Yang Quan City first Hospital), HB Ma, HR Zhang (Zhu Ma Dian City Center Hospital).

*Czech Republic (7 centers, 209 participants)* – P Kraml, National Advisor (Faculty Hospital Kralovske Vinohrady, Praha), J Rybka, L Svestka, L Kucharova, (Batova Nemocnice, Zlin), M Komrskova J Bartikova, (Diabetologicka ambulance, Pisek), R Benesova, M Honka (Fakultni Nemocnice, Ostrava), H Balabanova, P Girman, E Jirsova, , D Kobrova, J Kriz, T Sechser, J Slepickova (IKEM Praha), J Brezina (Interni Ambulance, Melnik), F Kulic, F Patek, P Pozivilova, M Tupa (Masarykova Nemocnice, Usti nad Labem), J Cerna, L Dohnalova, I Podiukova, P Tiser, R Zackova (Nemocnice Ceske Budejovice).

*Estonia (2 centers, 155 participants)* – R Kaasiku, T Podar, I Sulkovskaja, T Vinogradova (Department of Medicine, Tartu), T Jurgenson, U Kaasik, A Vork (Tallinn Central).

*France (9 centers, 196 participants)* – N Bedos-Chevalier, E Benamo, F Latil-Plat, P Rubin (CH Avignon - Hôpital Henri Duffaut), C Boch, M Chagnoux, T Khodabandehlou, C Le Devehat, J Pinel, C Vanhoutte, M Vimeux (CH Nevers), B Bouhanick, I Marty, C Pelle (CHU Angers), A Bekherras, O Cochereau, P Kouadio, M Marre, I Vukusic (CHU Bichat, Paris), N Bedos-Chevalier, A Maubon, M Rodier (CHU Hôpital Caremeau, Nimes), J-F Blickle, P Koch, G Loeb, D Paris-Bockel (CHU Hôpital Civil, Strasbourg), P Bohme, M Popieul, O Ziegler (CHU Hôpital Jeanne d'Arc, Nancy), C Demer, D Gendre, S Hadjadj, V Laneuze, R Marechaud, (Hôpital Jean Bernard la Miletrie, Poitiers), J-P Hespel, A-M Robert (Hôpital Pontchaillou, Rennes).

*Germany (2 centers, 327 participants)* – B Matschke, M Hanefeld, E Henkel, C Kohler, D Lehmann, P Ott, A Pahner, U Stier, T Temelkova-Kurktschiev (Centre for Clinical Studies GWT, TU Dresden), B Andratschke-Gentsch, G Bueschges, P Markhof, G Meier, M Nischwitz, S Schmid, C Von Schacky (Preventive Cardiology Med.Klinik, Munich).

*Hungary (12 centers, 434 participants)* – L Koranyi, National Advisor (Heart Centre Foundation-DRC Ltd, Balatonfüred), G Jermendy, J Nadas (Bajcsy Zsilinszky Kórház), C

Csongradi, G Kasa, T Kozma, Z Matyus, M Tarko (BAZ Megyei Kórház), L Koranyi, B Kovacs, E Kulcsar, (DRC Kft.), L Deak, Z Kovacs, G Rumi (Kaposi Mór Megyei Kórház), M Dudas, A Gyimesi, R Varga (Pándy Kálmán Megyei Kórház), I Csapo, J Fovenyi, I Hermanyi, G Kolev (Peterfy S.u. Kórház-Rendelőintezet), T Hidvegi, C Mate, I Nemeth, B Szeri (Petz Aladár Megyei Kórház), M Herold, B Sarman, A Somogyi (Sote II. Számú Belgyógyászati Klinika), M Balsay, Z Bencsik, E Eory, T Korodi, M Sereg (Szent György Kórház), Z Hohmann, Z Lengyel, P Voros (Szent István Kórház), E Domotor, T Fuleki, Z Munster (Vasutegeszsegugyi KHT.) Z Bujtor, T Oroszlan, F Tarnok (Zala Megyei Önkormányzat Kórháza).

*India (4 centers, 471 participants)* – R Anand, S Das, G Karthikeyan, R Lakshmy, N Naik, D Prabhakaran, KS Reddy, S Sen, N Tandon (All India Institute of Medical Sciences, Delhi), M Ahmed, M Ali, A Anjaneyulu, K Naidu, K Raju, L Rao, N Reddy, P Reddy, B Sethi, (Care Hospital, Hyderabad), P Joshi, S Kumbhalmar, K Lokhande, P Rathod, S Sable (Government Medical College, Nagpur), K Karkuzhali, S Mariyam, V Mohan, S Poongothai, G Premalatha, J Salomi, V Selvi, R Srinivasan, R Visalatchi (Madras Diabetic Research Foundation).

*Ireland (5 centers, 441 participants)* – M Ashraf, J Barton, J Chong, M Courcy, M Elfadil, C Kelly (Ballinasloe Hospital, Co. Galway), B Aloul, C Collier, E Dolan, C Foley, B Gallagher, B Gusau, L Hacke, E Ho, B Maguire, A Stanton, C Thompson, M Twohill (Beaumont Hospital, Dublin), R Firth, A Gribben, S Hoashi, M Joyce, H O'Loughlin, S Rizvi, B Wade (Mater Hospital, Dublin), A Brennan, D Byrne, M Cullen, A Khamis, M Murphy, M Ryan (St James Hospital, Dublin), M Bell, C Bramhill, C Campbell, N Corredia, L Cullen, J Gibney, T Kyaw Tun, K Mullan, D Owens, N Phelan, C Tan, G Tomkin (Tallaght Hospital, Dublin).

*Italy (1 center, 21 participants)* – P Galli, G Mancina, F Paleari, V Vilei, C Whisstock (Ospedale San Gerardo, U.O. Diabetologia, Milan).

*Lithuania (3 centers, 118 participants)* – R Babarskienie, I Milvidaite (Institute of Cardiology, Kaunas), A Gintautaite, R Sirvyte, G Varoneckas (Palanga Institute of Psychophysiology and Rehabilitation), V Grizas, J Marcinkeviciene, V Tumyniene, D Vasiliauskas, G Vytautas (Private Cardiological Clinic, Kaunas).

*Malaysia (5 centers, 236 participants)* – K Hla, A Kalairajah, S Nayar, L Ramanathan, (Hospital Ipoh), R Abdullah, W Bakar, T Ismail, N Kamaruddin, A Loganathan, F Majid, N Mansor, Z Mohamed, N Mustafa, H Nawawi, N Nor, K Subramaniam, K Yusoff (Hospital Putrajaya), N Aziz, G Eng Leong, C Gaik Kin, H Jeremiah, A Khir, S Lim, M Mumtaz (Penang Medical College), A Abdul Rashid, R Alias, S Bahari Ismail, W bt Wan Mohamad, R bt Zainal-Abidin, K Daud, R Doud, A-A Ismail, H Masandid, M Mohamed, M Mumtaz, S Wahab, W Wan Bebakar (Universiti Sains Malaysia, Kota Bharu), SP Chan, FL Hew, MH Lim, Rokiah P, KH Yeoh (University of Malaya Medical Centre, Kuala Lumpur).

*Netherlands (10 centers, 630 participants)* – M Alhakim, A Amin, K Asten, J vd Berg Putten, B Bierman, H Boer, R Bredemeijer, F Durian, A Jansen, P Muilwijk, J Muilwijk-

Vermeer, W Opstelten, S Ponteyn-Rose, C Sluijters, C Sumajow, J Swart, D Tavenier, L van Oort, J van Vliet, I van Welton (ANDROMED Baarn), P Blokzyl-Mol, H Bulk, D Faber-Mollema, T Leutscher, D Mulder, R Ottema, C Prins, E Soer, J Tiebesl (ANDROMED Groningen), M Fierkens, P Jaspers, Y Koster (ANDROMED Oost), T Bell, C Geerts, C Gieskes, H Jalloh-Vos, G Pegt, D Ramautarsing, W Schenk, W van Kempen, A van Kempen, J van Meurs, C Vink (ANDROMED Rotterdam), W Venekamp (Atrium Brunssum), L Bie, D Hollander-Bosboom, J Keyzer, A Lieveise, B Lokhorst, A Rompen, S Sanders, G ten Berge-Lammens, A van Foreest-Bruggink, M Vrugt (Diagnostisch Centrum Eindhoven / Justus Medical Research), I Boerema-Zikkenheiner, S de Haan-Zwart, R Timmerman, P Viergever (Gemini Ziekenhuis, Den Helder), W Bossen, B Elzinga, W Janssen, M Knot, A Prins (Martini Ziekenhuis, Groningen), L Boonman-de Winter, J Bosser-van Rijckevorsel, M de Zwaan-Herfst, E Erdtsieck-Ernste, M Froger-Nuyten, E Jonk-Smulders, A Offringa, A van der Smissen-van Meel, M van Veen (Stichting Huisartsen Laboratorium, Etten Leur), J Arendhorst, C Bonekamp, N Jans, P Meeuwese, M Scholten, B Tjaden, S van der Meer, R van Kuppevelt (Tollenslaan/Zeist).

*New Zealand (8 centers, 504 participants)* – C Florkowski, R McEwan, P McGregor, R Scott, C Strey (Christchurch Hospital), S Brown, J Kenyon, R Leikis, R Luke (Hawkes Bay), J Baker, W Chiu, R Clarke, A Dissanayake, M Elston, S Gunatilaka, G Kerr, J Leary, J Moffat, I Rosen, M Te Whiu (Middlemore Hospital, Auckland), S Austin, J Singh, G Ward (North Shore Hospital, Auckland), G Carswell, S Cruz, P Dixon, D Nesdale, H Snell (Palmerston North Hospital), C Barker, A Burton, J Doran, F Gale, M Hammond, M Hills (Timaru Hospital), F Bartley, P Dunn, A Johnstone, D McLeod, E Reda, A Waterman (Waikato Hospital), T Clarke, P Cresswell, C Eagleton, A Ferguson, A-M Gallen, L Kent, J Krebs, I Rosemergy, C Ross, R Smith (Wellington Hospital).

*Philippines (4 centers, 136 participants)* – G Capulong, P de la Pena, C Fabros, M Galan, S Pascual, M Que (East Avenue Medical Centre, Quezon City), J Agra, C Alcantara, G Avila, L Delos Santos, L Guzman, M Licaros, A Panelo, C Solfelix (Institute for Studies in Diabetes Foundation, Marikina City), J Aragon, M Capuli-Isidro, A Daria, L Del Rosario, C Derpo, C Gonzales, E Lim, A Litonjua, C Narvacan-Montano, T Obrero, J Oreal, R Pallera, E Pipo, C Pollisco, S Trinidad (Makati Medical Center, Manila), C Jimeno, M Lim-Abrahan, A Manansala, N Nicodemus (Philippine General Hospital, Manila).

*Poland (17 centers, 604 participants)* – A Januszewicz, National Advisor (Instytut Kardiologii, Warsaw), J Sieradzki National Advisor (Katedra i Klinika Chorob Metabolicznych CM UJ Krakow), K Kawecka-Jaszcz, M Klocek, A Mazur (I Klinika Kardiologii CM UJ, Krakow), M Blaszczyk, C Bloch, P Jdrzejczak, E Ziolkowska-Trzcinka (I Oddział Chorob Wewnętrznych Szpital Miejski, Kutno), M Frołow, J Kopczynska, M Makowski, R Nizankowski, T Petriczek, A Szczeklik, (II Katedra Chorob Wewnętrznych CM UJ, Krakow), T Klupa, J Sieradzki, I Trznadel-Morawska (Katedra i Klinika Chorob Metabolicznych CM UJ, Krakow), T Grodzicki, B Gryglewska, B Wizner (Katedra i Klinika Chorob Wewnętrznych i Gerontologii CM UJ, Krakow), E Orłowska-Kunikowska, M Przewdzia, B Wyrzykowski (Katedra i Klinika Nadciśnienia Tętniczego i Diabetologii AM, Gdansk), J Chudek, B Czerwińska, R Ficek, T Nieszporek, A Wiecek (Katedra i Klinika Nefrologii, Endokrynologii i Chorob Przemiany Materii SI.AM), U

Czubek, P Latacz, B Nessler, W Piwowarska (Klinika Choroby Wiencowej, Krakow), L Czupryniak, J Loba, M Pawlowski, M Saryusz-Wolska (Klinika Diabetologii, Lodz), J Kadziela, B Norwa-Otto, W Ruzyllo (Klinika Kardiologii Ogolnej / Intytyt Kardiologii, Warsaw), A Boruczowska, J Gluszek, T Kosicka, B Krasinska, A Tykarski, A Wichrowska (Klinika Nadcisenia Tetniczego i Chorob Naczyn AM, Poznan), S Czekalski, A Simachowicz, A Wasik-Olejniak (Klinika Nefrologii AM, Poznan), B Brzezicki, M Ciesielska, A Ganska, B Gornikiewicz-Brzezicka (NZOZ Poradnia Endokrynologii i Nadcisenia Tetniczego, Elblag), E Bandurska-Stankiewicz, U Tarasiewicz (Osrodek Diabetologii I Zaburzen Metabolizmu WSZ, Olsztyn), M Chlebus, A Najwa, E Trzepla, B Zapecka-Dubno (Poliklinika SPCSK, Warsaw), M Steuer, E Steuer (PULS MED, Katowice), W Dworzanski, K Michalczyk, J Pikula, E Tylec (Wojewodzki Szpital Specjalistyczny, Radom).

*Russia (7 centers, 164 participants)* – R Bogieva, I Chazova, D Duishvili, V Gornostaev, K **Mamyrbaeva**, V Moiseev, V Mychka (Cardiology Research Complex, Moscow), A Aleksandrov, T Kravchenko, I Martyanova, V Vilkov (Endocrinology Research Centre, Cardiology, Moscow), N Galitsyna, M Shestakova, N Zaytseva (Endocrinology Research Centre, Nephrology, Moscow), A Babenko, A Volkova, A Zalevskaya (Pavlov's Medical University, St Petersburg), Z Kaverzina, I Martyanova, D Nebieridze, R Oganov, S Tolpygina (Research Centre, Moscow), V Dorofeikov, F Gugova, A Konrady, A Kurbanovna, E Shlyakhto, N Zvartau (Research Institute, St Petersburg), T Dmitrova, A Fremovceva, I Kobalava, A Sirotkina (Russian People's Friendship University, Moscow).

*Slovakia (12 centers, 458 participants)* –I Balažovjeh, National Advisor (Fakultná Nemocnica, Bratislava) H Horvathova, B Krahulec, R Lahitova, R Lamitova, L Strbova, J Sukeova (Fakultná Nemocnica, Bratislava), M Mogan, D Pridavkova, S Smatanova, L Sutarik (Fakultná Nemocnica, Martin), E Simkova, V Spisak, D Stranankova (Interne oddelenie A - NsP, Zilina), J Morsky, L Ruffini, E Tataiova (Kardiologicka Ambulancia, Rimavska Sobota), S Krcmery, Z Mikes, (Klinika Geriatrie LFUK, Bratislava), L Hricova, A Jurcina, M Marcinova, M Sedlakova P Sefara, P Spurny, E Szokeova (Klinika gerontologie a geriatrie, Košice), M Snincak (Letecka Vojenska Nemocnica, Košice), A Banikova, M Gaziova, K Micko, J Nociar, M Pivkova, B Rajtukova (Nemocnica s Poliklinikou, Lucenec), V Ambrovicova, J Antolik, A Cibulkova, L Ondrusova, G Sojka (Nemocnica s poliklinikou, Levice), M Hranai, M Korpasova, P Minarik, O Moravcikova, M Porubska, J Sirotiakova, M Rac, (Nemocnica s poliklinikou, Nitra), J Mazur, M Moravcova, P Sulej (NsP-JIS, Dolny Kubin), L Beles, K Belesova, G Jakabova, M Zelinska (Poliklinika Vychod, Košice).

*United Kingdom (22 centers, 1324 participants)* – M Bruce, A De Vries, J Furnace, C Jamieson, M Macleod, P McDonald, S Ross (Aberdeen Royal Infirmary), J Bright, D Darko, D Hopkins (Central Middlesex Hospital), G Beevers, R Haynes, V Karthikeyan, HS Lim, GYH Lip, J Partridge, (City Hospital, Birmingham), M Appleby, R Donnelly, A-M Dwyer, T Gibson, A Scott (Derbyshire Royal Infirmary), B Fisher, J Gray, J McKenzie, G Paice (Glasgow Royal Infirmary), A Baksi, J Bartlett, D Hogan, S Moody, Z Thomas, E Whittingstall, P Wilson (St Mary's Hospital, Isle of Wight), S Jackson, L Meakin, L Walwyn (Leicester Royal Infirmary), S Chandran, S Heslop, A Joshi, J Vora, F Westwell, H White (Royal Liverpool University Hospital), M Banerjee, J Collins, K Cruickshank, J

Dunkerley, C Harrison, K Hart, M Holland, M Luckson, S Shaw, T Wood (Manchester Royal Infirmary), F Forbes, K Gallagher, A Harrower, D Matthews, E McIntyre, G McKay, J McMahon (Monklands Hospital, Airdrie), L Dudgeon, C Fox, K Hall, M Hollway, L James, S Marsh, D Morgan, G Nayani, V Richards, C Staff, J Stockman (Northampton General Hospital), D James, V Patel, C Randall (George Elliot Hospital, Nuneaton), A Begg, R Grogan, J Hinnie, M McIntyre (Royal Alexandra Hospital, Paisley), F Coates, P Davies, A George, S Golding-Cook, C Hamon, M Jefferies, E Kolinsky, C Meachin, A Millward, K Neeves, M Soler-Lopez, J Stokes (Clinical Research Unit, Plymouth Postgraduate Medical School), B Cunningham, D Ghosh, M Mukhtar, E Simpson, H Simpson (The Diabetes Centre, Reading), R Howard, J Inglis, R Mukhtar, J Reckless, A Robinson, C Shute, C Stirling, A Ward (Royal United Hospital, Bath), J Day, C Green, P Jackson, A Roberts, E Wallis (Sheffield Hallamshire Hospital), M Cunningham, S Heller, S Hudson (Sheffield Northern Hospital), B Ariff, J Bunker, W Callister, C Coghlan, R Elkeles, R Fernandez, V Gordon, J Harman, N Jugnee, L Knisley, J Macduff, J Mackay, K McFadden-Lewis, A McKerracher, P Mistry, S Mitchell, S Murphy, A Strain, S Thom, O Trainor, S Whitehouse, A Zambanni (St. Marys Hospital, London), S Boardman, C Reid, V Reid (Warwick General Hospital), C Coddington, A Ellis, C Holliday, C Slater (West Byfleet Health Care Research), D Brown, V Dawson, H Gibson, P Jennings, J Thow, S Whitwell (York District Hospital).

## 2. Recommendations for Participant Management in the Intensive Group using both HbA1c and Fasting Blood Glucose (FBG)

|           |         | Fasting Blood Glucose                                                                                                                                                                                                                                                                            |                                                                                                                                                                                                                                                                             |                                                                                                                                                                                                                                                                      |
|-----------|---------|--------------------------------------------------------------------------------------------------------------------------------------------------------------------------------------------------------------------------------------------------------------------------------------------------|-----------------------------------------------------------------------------------------------------------------------------------------------------------------------------------------------------------------------------------------------------------------------------|----------------------------------------------------------------------------------------------------------------------------------------------------------------------------------------------------------------------------------------------------------------------|
|           |         | <6.0 mmol/L/<108 mg/dl                                                                                                                                                                                                                                                                           | 6.0-7.0 mmol/L/108-126 mg/dl                                                                                                                                                                                                                                                | >7.0 mmol/L/>126 mg/dl                                                                                                                                                                                                                                               |
| HbA1c (%) | <6.0    | <b>GOOD CONTROL</b> <ul style="list-style-type: none"> <li>• Check/prevent hypos</li> <li>• Continue current therapy and diet and exercise recommendations</li> </ul>                                                                                                                            | <b>FAIR CONTROL but possible inconsistent FBG and HbA1c</b> <ul style="list-style-type: none"> <li>• Check HbA1c assay reliability<sup>2</sup></li> <li>• Consider adjusting treatment according to blood glucose levels</li> <li>• Check/prevent day time hypos</li> </ul> | <b>LIKELY POOR CONTROL but inconsistent FBG and HbA1c</b> <ul style="list-style-type: none"> <li>• Check HbA1c assay reliability<sup>2</sup></li> <li>• Obtain 24H glucose profile<sup>4</sup></li> <li>• Adjust levels according to blood glucose levels</li> </ul> |
|           | 6.0-6.5 | <b>GOOD CONTROL</b> <ul style="list-style-type: none"> <li>• Check/prevent hypos</li> <li>• Continue current therapy</li> <li>• Optimise diet and exercise</li> </ul>                                                                                                                            | <b>FAIR CONTROL</b> <ul style="list-style-type: none"> <li>• Consider increasing treatment</li> <li>• Optimise diet and exercise</li> </ul>                                                                                                                                 | <b>LIKELY POOR CONTROL but inconsistent FBG and HbA1c</b> <ul style="list-style-type: none"> <li>• Check HbA1c assay reliability<sup>2</sup></li> <li>• Obtain 24H glucose profile<sup>4</sup></li> <li>• Adjust levels according to blood glucose levels</li> </ul> |
|           | 6.6-7.0 | <b>LIKELY POOR CONTROL but inconsistent FBG and HbA1c</b> <ul style="list-style-type: none"> <li>• Check FBG reliability<sup>1</sup></li> <li>• Check HbA1c assay reliability<sup>2</sup></li> <li>• Check post prandial values</li> <li>• Focus on mealtime intervention<sup>3</sup></li> </ul> | <b>INSUFFICIENT CONTROL</b> <ul style="list-style-type: none"> <li>• Increase in treatment required<sup>5</sup></li> </ul>                                                                                                                                                  | <b>POOR CONTROL</b> <ul style="list-style-type: none"> <li>• Urgent increase in treatment required<sup>5</sup></li> </ul>                                                                                                                                            |
|           | >7.0    | <b>LIKELY POOR CONTROL but inconsistent FBG and HbA1c</b> <ul style="list-style-type: none"> <li>• Check FBG reliability<sup>1</sup></li> <li>• Check HbA1c assay reliability<sup>2</sup></li> <li>• Check post prandial values</li> <li>• Focus on mealtime intervention<sup>3</sup></li> </ul> | <b>POOR CONTROL</b> <ul style="list-style-type: none"> <li>• Urgent increase in treatment required<sup>5</sup></li> </ul>                                                                                                                                                   | <b>POOR CONTROL</b> <ul style="list-style-type: none"> <li>• Urgent increase in treatment required<sup>5</sup></li> </ul>                                                                                                                                            |

<sup>1</sup> FBG results can be unreliable due to inappropriate use of the meter (drop size, calibration issues etc), patient misreporting results

<sup>2</sup> HbA1c results can be unreliable due to assay issues (both over and underestimation can occur), anaemia or blood transfusion, abnormal haemoglobin

<sup>3</sup> Optimise diet, optimise post prandial exercise, add acarbose, add short acting insulin if already treated with insulin

<sup>4</sup> Obtain repeated 24h glucose profile, including post prandial and night time blood glucose values, in order to detect unexpectedly low and high values

<sup>5</sup> Suggested drug treatment steps: 1. Add gliclazide MR; 2. Increase the dose of gliclazide MR (30-120 mg); 3. Add or increase the dose of metformin; 4. Add or increase the dose of thiazolidinedione; 5. Add or increase the dose of alpha-glucosidase inhibitor; 6. Add bed time insulin therapy; 7. Add a full insulin regimen or increase the dose of a full insulin regimen

### 3. HbA1c standardization

Laboratories participating in ADVANCE underwent a standardization process using the Wales External Quality Assurance Scheme (WEQAS) (1). Eight samples of lyophilized human whole blood covering the pathological range were analyzed by each laboratory. Target values for all samples were assigned for Diabetes Control and Complications Trial (DCCT) and the International Federation of Clinical Chemistry (IFCC) reference methods (2). Results from the central lab were considered the gold standard values and were used to calibrate the measurements from each study laboratory.

#### *Statistical methods:*

For each laboratory, the following linear regression was performed:

$$Y^L = aY^R + b + \varepsilon$$

where

- $Y^L$  = results from 8 standard samples tested by the laboratory
- $Y^R$  = 8 reference (gold standard) means using the same method
- $a$  = slope parameter of linear regression to estimate
- $b$  = intercept parameter of linear regression to estimate
- $\varepsilon$  = residual errors.

A brief examination of the distribution of the residual errors  $\varepsilon$  served to assess the goodness-of-fit of the linear model.

Standardization of measurements: Using the regression parameters  $a$  and  $b$  estimated from the linear regression for each laboratory, all the original HbA1c measurements were corrected using the following formula:

$$Y^S = (Y^O - b^{\wedge}) / \hat{a}$$

- Where
- $Y^S$  = new standardized measurements of %HbA1c within laboratory
  - $Y^O$  = original observed measurements of %HbA1c within laboratory
  - $\hat{a}$  = slope parameter estimated from the previous linear regression
  - $b^{\wedge}$  = intercept parameter estimated from the previous linear regression

### References

1. Wales External Quality Assurance Scheme. (Accessed 14th March, 2008, at <http://www.weqas.com>.)
2. The American Diabetes Association, European Association for the Study of Diabetes, International Federation of Clinical Chemistry and Laboratory Medicine, International Diabetes Federation. Consensus Statement on the Worldwide Standardization of the Hemoglobin A1C Measurement. *Diabetes Care*. 2007;30:2399-400.

**4. Supplementary Figure 1. Mean blood pressure levels among participants randomized to intensive and standard glucose control during follow-up.**

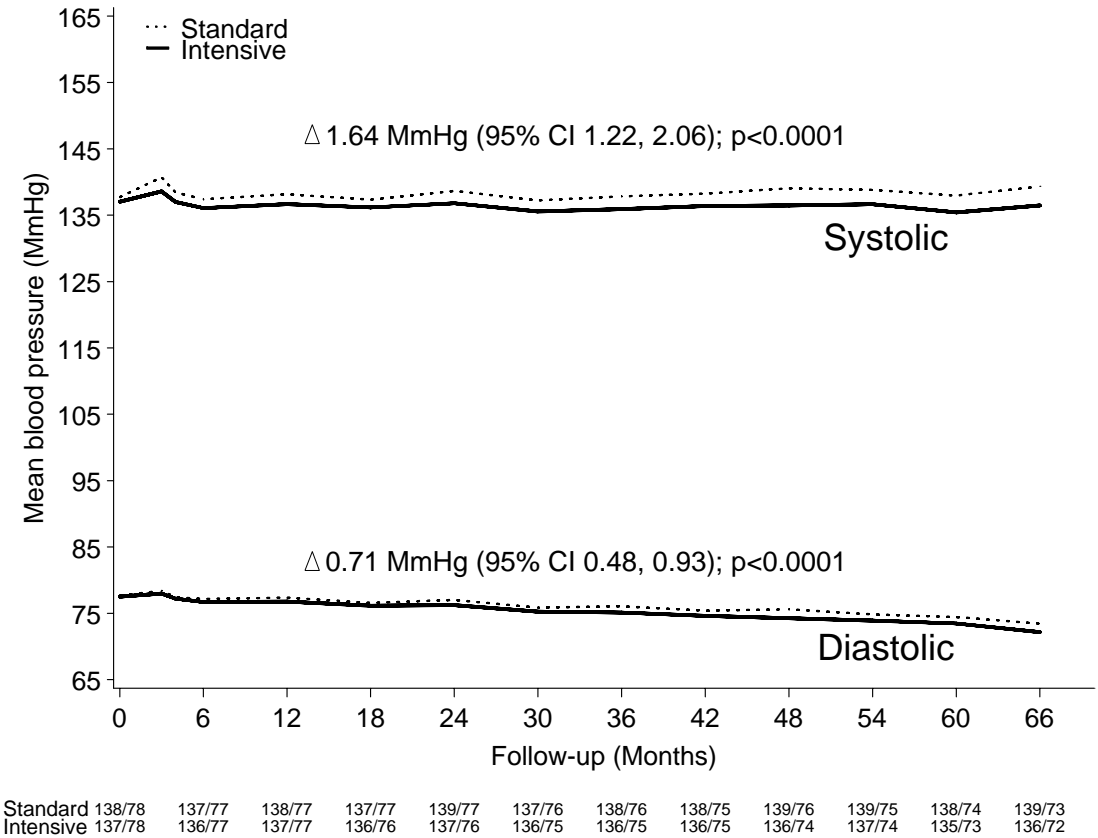

### 5. Supplementary Table 1. Additional data on diabetes management at baseline and end of follow-up

| Characteristic                                                   | Baseline*                             |                                      | End of follow-up                      |                                      |
|------------------------------------------------------------------|---------------------------------------|--------------------------------------|---------------------------------------|--------------------------------------|
|                                                                  | Intensive glucose control<br>(n=5571) | Standard glucose control<br>(n=5569) | Intensive glucose control<br>(n=4828) | Standard glucose control<br>(n=4741) |
| <b>Insulin treatment</b>                                         |                                       |                                      |                                       |                                      |
| Treated with long-term insulin, n (%)                            | -                                     | -                                    | 1953 (41)                             | 1142 (24)                            |
| Number of insulin injections per day                             |                                       |                                      |                                       |                                      |
| 1 injection, n (%)                                               | -                                     | -                                    | 649 (33)                              | 284 (25)                             |
| 2 injections, n (%)                                              | -                                     | -                                    | 940 (48)                              | 645 (57)                             |
| 3 or more injections or insulin pump therapy, n (%)              | -                                     | -                                    | 362 (19)                              | 210 (18)                             |
| Number of units of insulin per day, mean (sd)                    | -                                     | -                                    | 37.3 (28.4)                           | 39.8 (27.2)                          |
| Number of units of insulin per day per kg body weight, mean (sd) | -                                     | -                                    | 0.5 (0.3)                             | 0.5 (0.3)                            |
| Insulin type                                                     |                                       |                                      |                                       |                                      |
| Long-acting insulin NPH, n (%)                                   | -                                     | -                                    | 638 (33)                              | 310 (26)                             |
| Long-acting insulin analogue Glargine, n (%)                     | -                                     | -                                    | 266 (14)                              | 145 (13)                             |
| Long-acting insulin analogue Detemir, n (%)                      | -                                     | -                                    | 81 (4)                                | 32 (3)                               |
| Short-acting regular insulin, n (%)                              | -                                     | -                                    | 195 (10)                              | 129 (11)                             |
| Short-acting insulin analogue, n (%)                             | -                                     | -                                    | 175 (9)                               | 94 (8)                               |
| Premixed insulin (regular/NPH or analogue/NPH), n (%)            | -                                     | -                                    | 922 (47)                              | 609 (53)                             |
| <b>Combinations of glucose lowering drugs</b>                    |                                       |                                      |                                       |                                      |
| SU* alone, n (%)                                                 | 1386 (25)                             | 1378 (25)                            | 482 (10)                              | 510 (11)                             |
| MET alone, n (%)                                                 | 864 (16)                              | 903 (16)                             | 58 (1)                                | 561 (12)                             |
| TZD alone, n (%)                                                 | 4 (0.1)                               | 12 (0.2)                             | 0 (0)                                 | 12 (0.3)                             |
| SU* + MET, n (%)                                                 | 1999 (36)                             | 2005 (36)                            | 1226 (26)                             | 1277 (28)                            |
| SU* + TZD, n (%)                                                 | 28 (0.5)                              | 44 (0.8)                             | 84 (2)                                | 61 (1)                               |

|                                                                              |           |           |           |           |
|------------------------------------------------------------------------------|-----------|-----------|-----------|-----------|
| SU* + MET + TZD, n (%)                                                       | 116 (2)   | 90 (2)    | 350 (7)   | 217 (5)   |
| Insulin alone, n (%)                                                         | 9 (0.2)   | 14 (0.3)  | 112 (2)   | 341 (7)   |
| Insulin + SU*, n (%)                                                         | 20 (0.4)  | 20 (0.4)  | 273 (6)   | 70 (2)    |
| Insulin + MET, n (%)                                                         | 10 (0.2)  | 11 (0.2)  | 135 (3)   | 282 (6)   |
| Insulin + TZD, n (%)                                                         | 1 (<0.1)  | 2 (<0.1)  | 4 (0.1)   | 8 (0.2)   |
| Insulin + SU* + MET, n (%)                                                   | 22 (0.4)  | 17 (0.3)  | 809 (17)  | 206 (5)   |
| Insulin + SU* + MET + TZD, n (%)                                             | 2 (<0.1)  | 0 (0)     | 126 (3)   | 18 (0.4)  |
| <b>Other parameters</b>                                                      |           |           |           |           |
| Number of mild exercise sessions lasting >15 minutes per week, mean (sd)     | 5.3 (6.9) | 5.5 (7.1) | 6.6 (7.7) | 6.8 (8.2) |
| Number of moderate exercise sessions lasting >15 minutes per week, mean (sd) | 2.9 (4.7) | 3.0 (5.1) | 3.2 (5.7) | 3.0 (5.2) |
| Number of vigorous exercise sessions lasting >15 minutes per week, mean (sd) | 0.5 (2.4) | 0.5 (1.8) | 0.5 (2.3) | 0.4 (1.9) |
| Home blood glucose monitoring, n (%)                                         | 2140 (38) | 2199 (39) | 4469 (96) | 2865 (63) |

---

\* includes gliclazide (modified release)

## 6. Supplementary Table 2. Reasons for all hospitalizations during follow-up

| International Classification of Disease (version 10) term and code                                            | Intensive<br>glucose<br>control<br>(n=5645) | Standard<br>glucose<br>control<br>(n=5038) |
|---------------------------------------------------------------------------------------------------------------|---------------------------------------------|--------------------------------------------|
|                                                                                                               | <i>number (%)</i>                           |                                            |
| Certain infectious and parasitic diseases (A00-B99)                                                           | 72 (1.3)                                    | 59 (1.1)                                   |
| Neoplasms (C00-D48)                                                                                           | 119 (2.1)                                   | 119 (2.1)                                  |
| Diseases of the blood and blood-forming organs and certain disorders involving the immune mechanism (D50-D89) | 62 (1.1)                                    | 63 (1.1)                                   |
| Endocrine, nutritional, and metabolic diseases (E00-E90) (excluding major hypoglycemia)                       | 283 (5.0)                                   | 281 (5.6)                                  |
| Major hypoglycemia (E11.64)                                                                                   | 67 (1.2)                                    | 45 (0.9)                                   |
| Mental and behavioural disorders (F00-F99)                                                                    | 36 (0.6)                                    | 22 (0.4)                                   |
| Diseases of the nervous system (G00-G99)                                                                      | 127 (2.3)                                   | 96 (1.7)                                   |
| Diseases of the eye and adnexa (H00-H59)                                                                      | 163 (2.9)                                   | 156 (2.8)                                  |
| Diseases of the ear and mastoid process (H60-H95)                                                             | 20 (0.4)                                    | 19 (0.3)                                   |
| Diseases of the circulatory system (I00-I99)                                                                  | 927 (16.6)                                  | 890 (16.0)                                 |
| Diseases of the respiratory system (J00-J99)                                                                  | 271 (4.9)                                   | 260 (4.7)                                  |
| Diseases of the digestive system (K00-K93)                                                                    | 397 (7.1)                                   | 333 (6.0)                                  |
| Diseases of the skin and subcutaneous tissue (L00-L99)                                                        | 70 (1.3)                                    | 62 (1.1)                                   |
| Diseases of the musculoskeletal system and connective tissue (M00-M99)                                        | 299 (5.4)                                   | 246 (4.4)                                  |
| Diseases of the genitourinary system (N00-N99)                                                                | 245 (4.4)                                   | 232 (4.2)                                  |
| Congenital malformations, deformations, and chromosomal abnormalities (Q00-Q99)                               | 6 (0.1)                                     | 6 (0.1)                                    |
| Symptoms, signs, and abnormal clinical and laboratory findings, not elsewhere classified (R00-R99)            | 363 (6.5)                                   | 316 (5.7)                                  |
| Injury, poisoning, and certain other consequences of external causes (S00-T98)                                | 209 (3.8)                                   | 171 (3.1)                                  |
| External causes of morbidity and mortality (V01-Y98)                                                          | 7 (0.1)                                     | 6 (0.1)                                    |
| Factors influencing health and contact with health services (Z00-Z99)                                         | 51 (0.9)                                    | 51 (0.9)                                   |
| Other                                                                                                         | 60 (1.1)                                    | 51 (0.9)                                   |
